# Supplementary material for: CCR2 inhibition sequesters multiple subsets of leukocytes in the bone marrow
Source: PubMed Central journal article supplement (PMC4513281; doi:10.1038/srep11664), 2015-07-24
Supplement: srep11664-s1.pdf [file srep11664-s1.pdf]

**Title:**

CCR2 inhibition sequesters multiple subsets of leukocytes in the bone marrow

**Authors:**

Naoki Fujimura<sup>1,2</sup>, Baohui Xu<sup>1\*</sup>, Jackson Dalman<sup>1</sup>, Hongping Deng<sup>1</sup>, Kohji Aoyama<sup>3</sup> & Ronald L Dalman<sup>1</sup>

<sup>1</sup>Departments of Surgery, Stanford University School of Medicine, Stanford, CA 94305, USA

<sup>2</sup>Department of Vascular Surgery, Saiseikai Central Hospital, Minato-Ku Mita 1-4-17, Tokyo 108-0073, Japan

<sup>3</sup>Department of Hygiene and Health Promotion Medicine, Kagoshima University School of Medicine, Sakuragaoka 8-35-1, Kagoshima 890-0075, Japan

**\*Correspondence to:**

Baohui Xu, MD/PhD  
Department of Surgery  
Stanford University School of Medicine  
Room P323, MSLS Building  
1201 Welch Road, Stanford, CA 94305  
Phone: 650-724-7582  
Email: baohuixu@stanford.edu

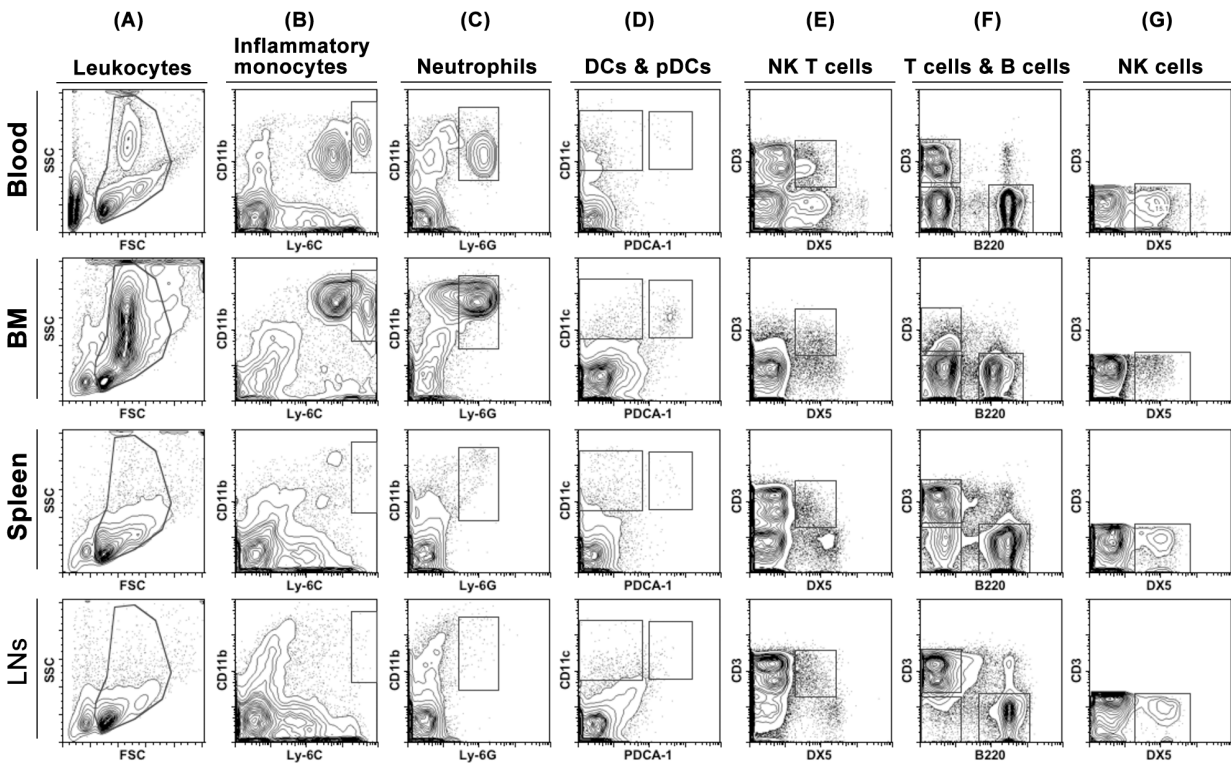

**Supplementary Figure 1. Flow cytometric strategies for identifying leukocyte subsets.** In all experiments, tail vein blood (in 5 mM EDTA/PBS) and cell suspensions isolated from femur bone, spleen and cervical LNs were stained with differentially fluorescence dye-labeled mAb combinations. (A): FSC and SSC identified total leukocytes for further analyses in panels B-F. (B): CD11b and Ly-6C mAb staining identified inflammatory monocytes as CD11b<sup>+</sup>Ly-6C<sup>high</sup> cells. (C): CD11b and Ly-6G mAb staining identified neutrophils as CD11b<sup>+</sup>Ly-6G<sup>+</sup> cells. (D): CD11c and PDCA-1 mAb staining identified DCs and pDCs as CD11c<sup>+</sup>PDCA-1<sup>-</sup> and CD11c<sup>+</sup>PDCA-1<sup>+</sup> cells, respectively. (E, F): CD3, B220 and DX5 mAb staining identified NK T cells as CD3<sup>+</sup>DX5<sup>+</sup> cells (E), T cells as CD3<sup>+</sup>B220<sup>-</sup> cells (F), B cells as CD3<sup>-</sup>B220<sup>+</sup> cells (F), and CD3<sup>-</sup>B220<sup>-</sup> cells (F). (G): DX5 mAb staining identified NK cells as DX5<sup>+</sup> cells in CD3<sup>-</sup>B220<sup>-</sup> cells gated in panel F.

**Supplementary Table 1.** Effects of CCR2 deficiency on the relative numbers of individual leukocyte subsets in the peripheral blood and lymphoid tissues

| Tissue                 | Blood                   |                         | BM                      |                         | LNs                     |                         | Spleen                  |                         |
|------------------------|-------------------------|-------------------------|-------------------------|-------------------------|-------------------------|-------------------------|-------------------------|-------------------------|
|                        | CCR2-RFP <sup>+/-</sup> | CCR2-RFP <sup>+/+</sup> | CCR2-RFP <sup>+/-</sup> | CCR2-RFP <sup>+/+</sup> | CCR2-RFP <sup>+/-</sup> | CCR2-RFP <sup>+/+</sup> | CCR2-RFP <sup>+/-</sup> | CCR2-RFP <sup>+/+</sup> |
| Inflammatory monocytes | 3.1 ± 0.3               | 0.5 ± 0.2**             | 9.6 ± 0.7               | 8.3 ± 0.6*              | 0.13 ± 0.03             | 0.05 ± 0.03**           | 0.7 ± 0.2               | 0.2 ± 0.1**             |
| Neutrophils            | 15.9 ± 2.4              | 14.9 ± 4.5              | 51.2 ± 5.4              | 46.8 ± 3.5              | 0.4 ± 0.1               | 0.2 ± 0.1*              | 3.2 ± 0.5               | 2.5 ± 0.5**             |
| DCs                    | 7.0 ± 0.4               | 5.4 ± 0.4**             | 1.8 ± 0.2               | 1.5 ± 0.2               | 2.2 ± 0.2               | 1.7 ± 0.2**             | 8.2 ± 0.5               | 7.8 ± 0.9               |
| pDCs                   | 0.3 ± 0.0               | 0.2 ± 0.1               | 2.0 ± 0.2               | 2.0 ± 0.2               | 0.4 ± 0.1               | 0.2 ± 0.1*              | 0.4 ± 0.1               | 0.3 ± 0.2               |
| NK cells               | 9.0 ± 1.3               | 9.1 ± 0.7               | 2.4 ± 0.4               | 2.3 ± 0.2               | 0.4 ± 0.1               | 0.4 ± 0.1               | 4.4 ± 0.6               | 5.0 ± 0.4               |
| NK T cells             | 3.5 ± 0.3               | 5.3 ± 0.6**             | 0.8 ± 0.3               | 1.0 ± 0.1               | 0.5 ± 0.1               | 0.7 ± 0.2               | 1.0 ± 0.1               | 2.3 ± 0.3**             |
| T cells                | 17.5 ± 1.1              | 28.8 ± 0.8**            | 5.5 ± 1.6               | 5.1 ± 0.7               | 78.6 ± 2.1              | 78.6 ± 5.1              | 45.4 ± 2.9              | 54.2 ± 4.8*             |
| B cells                | 42.1 ± 2.9              | 30.6 ± 3.2**            | 15.4 ± 4.8              | 21.7 ± 4.8              | 14.3 ± 2.1              | 14.2 ± 4.5              | 35.8 ± 3.5              | 28.8 ± 3.0*             |

All data are given as the percentages of individual leukocyte subsets in total leukocytes. CCR2-RFP<sup>+/-</sup>: CCR2 intact mice. CCR2-RFP<sup>+/+</sup>: CCR2 deficient mice. Welch's unpaired T test, \*P<0.05 & \*\*P<0.01 compared to WT mice. n=5 mice in each group.

**Supplementary Table 2.** Effects of pharmacological CCR2 inhibitor PG treatment on the relative numbers of individual leukocyte subsets in the peripheral blood and lymphoid tissues

| Tissue                 | Blood       |             | BM         |            | LNs         |            | Spleen     |            |
|------------------------|-------------|-------------|------------|------------|-------------|------------|------------|------------|
|                        | Vehicle     | PG          | Vehicle    | PG         | Vehicle     | PG         | Vehicle    | PG         |
| Inflammatory monocytes | 5.5 ± 3.8   | 6.1 ± 4.8   | 6.6 ± 1.5  | 4.6 ± 1.0* | 0.2 ± 0.1   | 0.2 ± 0.2  | 0.8 ± 0.6  | 1.5 ± 1.5  |
| Neutrophils            | 28.7 ± 20.1 | 40.8 ± 14.7 | 53.5 ± 3.9 | 50.0 ± 6.4 | 0.4 ± 0.2   | 0.4 ± 0.3  | 2.5 ± 1.2  | 5.5 ± 4.7  |
| DCs                    | 7.2 ± 1.8   | 6.1 ± 2.1   | 3.4 ± 0.8  | 2.7 ± 0.8  | 5.4 ± 2.4   | 4.2 ± 2.1  | 7.3 ± 1.9  | 6.1 ± 1.7  |
| pDCs                   | 0.2 ± 0.1   | 0.2 ± 0.1   | 1.4 ± 0.3  | 1.3 ± 0.4  | 0.6 ± 0.4   | 1.0 ± 0.7  | 0.2 ± 0.1  | 0.1 ± 0.0  |
| NK cells               | 7.1 ± 2.0   | 6.9 ± 1.2   | 2.0 ± 0.5  | 1.7 ± 0.6  | 0.7 ± 0.2   | 0.6 ± 0.2  | 3.9 ± 1.5  | 4.2 ± 1.4  |
| NK T cells             | 1.4 ± 0.1   | 1.2 ± 0.5   | 1.4 ± 0.2  | 1.3 ± 0.4  | 2.1 ± 1.1   | 2.4 ± 1.4  | 1.8 ± 0.7  | 1.8 ± 0.7  |
| T cells                | 17.0 ± 7.7  | 17.4 ± 10.0 | 13.5 ± 7.1 | 13.5 ± 9.0 | 65.6 ± 11.4 | 64.8 ± 7.9 | 40.2 ± 7.0 | 43.1 ± 8.0 |
| B cells                | 33.2 ± 16.5 | 23.2 ± 11.3 | 9.1 ± 3.3  | 9.5 ± 4.1  | 27.3 ± 8.3  | 28.4 ± 5.6 | 41.3 ± 7.5 | 36.4 ± 9.3 |

All data are given as the percentages of individual leukocyte subsets in total leukocytes. Welch's unpaired T test, \*P<0.05 compared to vehicle-treated mice. n=7 mice in each group.

**Supplementary Table 3.** Effects of pharmacological CCR2 inhibitor PG treatment on the relative numbers of individual leukocyte subsets in the peripheral blood and lymphoid tissues in LPS-treated mice

| Tissue                 | Blood       |             | BM         |            | LNs        |            | Spleen     |             |
|------------------------|-------------|-------------|------------|------------|------------|------------|------------|-------------|
|                        | Vehicle     | PG          | Vehicle    | PG         | Vehicle    | PG         | Vehicle    | PG          |
| Inflammatory monocytes | 20.2 ± 3.1  | 16.6 ± 3.2  | 5.4 ± 0.9  | 5.3 ± 0.9  | 0.1 ± 0.1  | 0.1 ± 0.1  | 2.0 ± 0.7  | 1.7 ± 0.6   |
| Neutrophils            | 53.8 ± 7.9  | 53.4 ± 7.5  | 47.1 ± 2.0 | 43.4 ± 2.9 | 0.7 ± 0.5  | 0.8 ± 0.4  | 5.3 ± 0.7  | 5.3 ± 0.9   |
| DCs                    | 3.2 ± 1.2   | 2.7 ± 0.3   | 1.1 ± 0.2  | 1.0 ± 0.2  | 1.4 ± 0.4  | 1.4 ± 0.3  | 3.1 ± 0.4  | 4.0 ± 0.2** |
| pDCs                   | 0.5 ± 0.2   | 0.4 ± 0.1   | 2.0 ± 0.3  | 2.0 ± 0.2  | 0.4 ± 0.1  | 0.5 ± 0.2  | 0.6 ± 0.2  | 0.9 ± 0.2   |
| NK cells               | 8.4 ± 2.1   | 10.6 ± 2.1  | 2.3 ± 0.2  | 2.5 ± 0.4  | 0.4 ± 0.1  | 0.3 ± 0.1  | 2.6 ± 0.6  | 2.7 ± 0.7   |
| NK T cells             | 1.8 ± 0.8   | 2.3 ± 0.6   | 2.5 ± 0.2  | 2.1 ± 0.3  | 2.3 ± 0.7  | 1.6 ± 0.4  | 3.8 ± 1.3  | 3.4 ± 0.7   |
| T cells                | 10.0 ± 2.4  | 10.9 ± 2.4  | 7.5 ± 0.9  | 6.0 ± 0.5* | 64.3 ± 5.6 | 67.7 ± 4.9 | 48.9 ± 3.6 | 50.0 ± 2.0  |
| B cells                | 36.0 ± 15.1 | 26.8 ± 11.3 | 7.9 ± 0.6  | 9.3 ± 4.7  | 28.1 ± 9.1 | 28.0 ± 6.8 | 40.7 ± 6.6 | 33.9 ± 9.9  |

All data are given as the percentages of individual leukocyte subsets in total leukocytes. Welch's unpaired T test, \*P<0.05 & \*\*P<0.01 compared to vehicle-treated mice. n=5 mice in each group.
